# Supplementary material
Source: ML conference proceedings conference paper supplement (https://proceedings.neurips.cc/paper_files/paper/2013/hash/98f13708210194c475687be6106a3b84-Abstract.html)

a) "Different"-20 NewsGroup Results

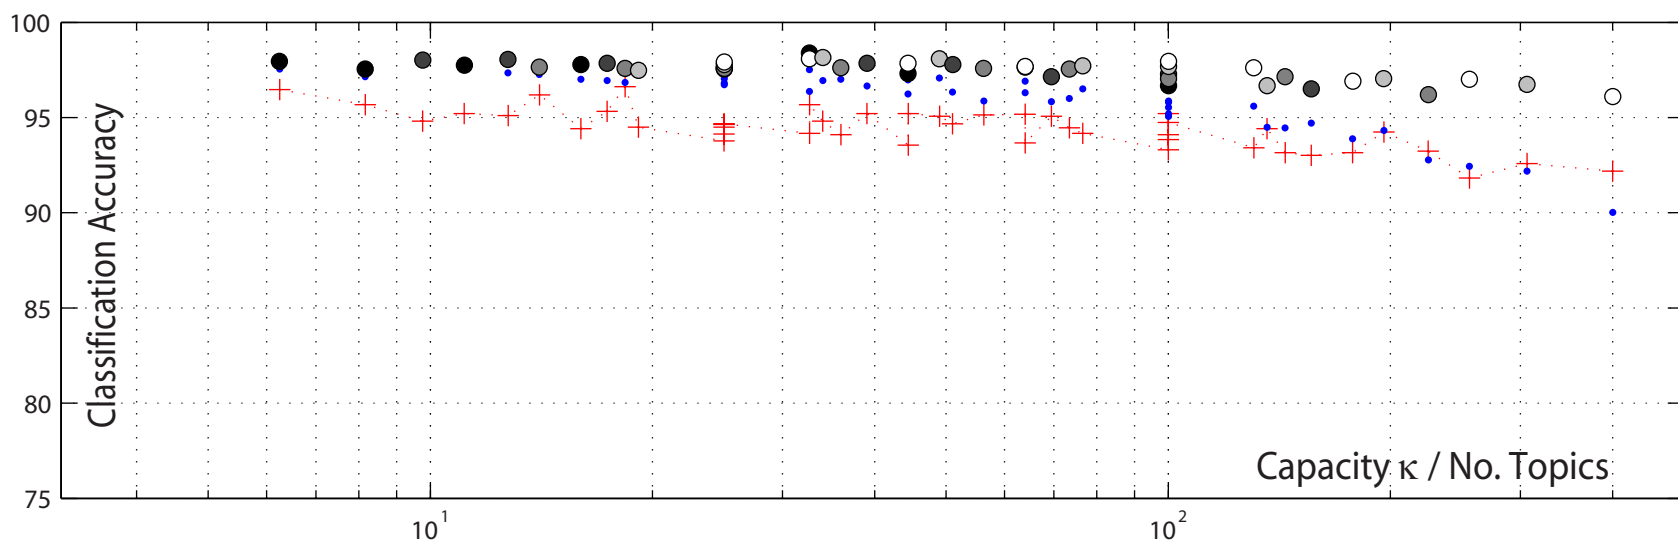

b) "Similar"-20 NewsGroup Results

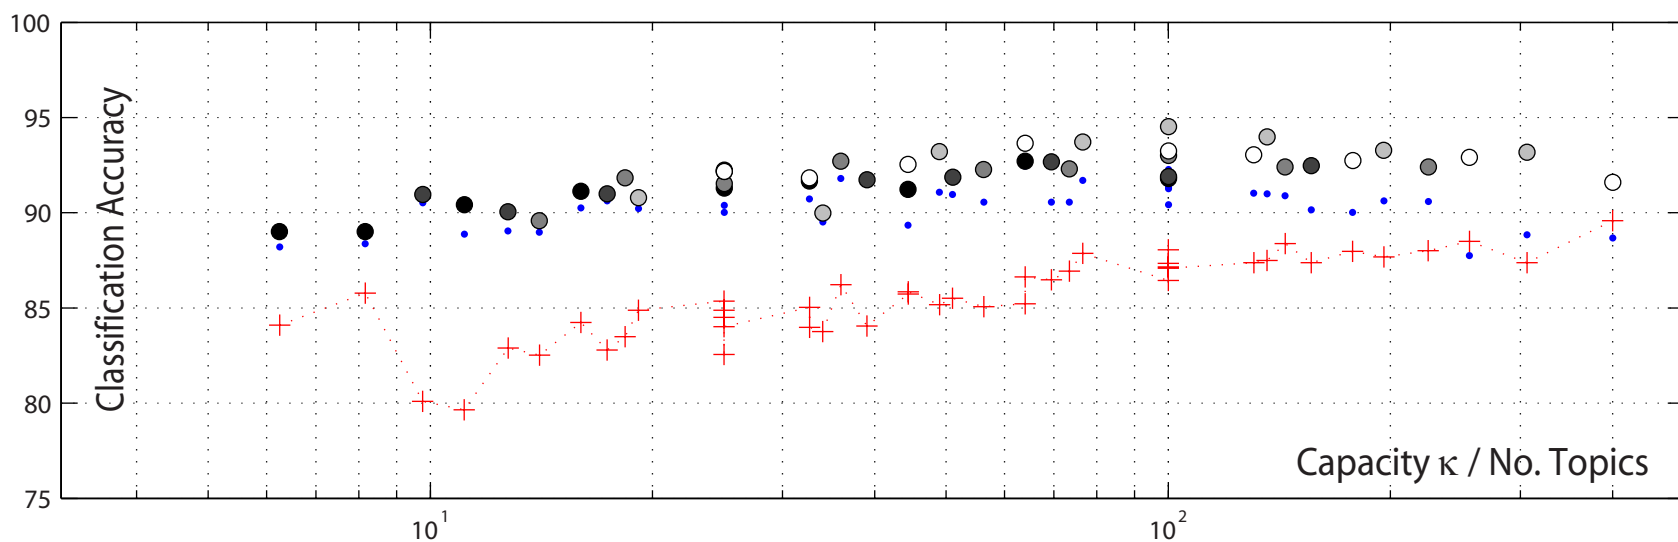

c) Sport Event Dataset (Visual features only) -

What, where and who? Classifying event by scene and object recognition, ICCV 2007

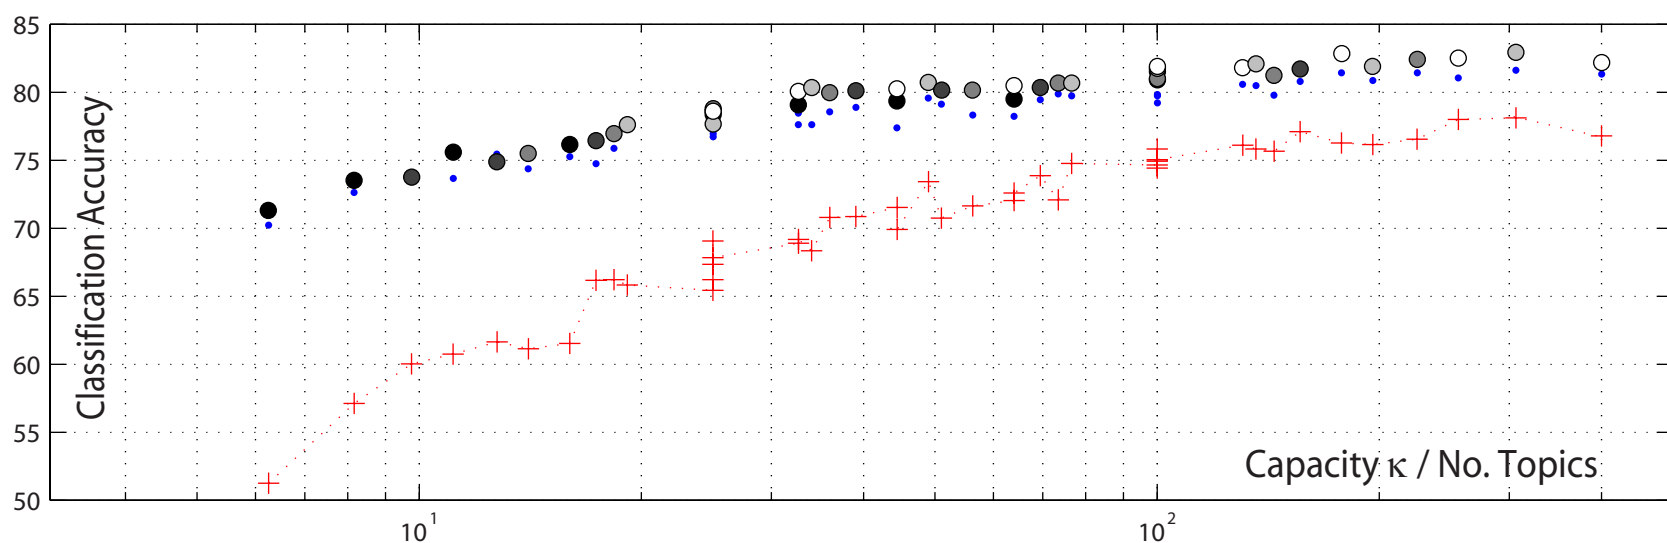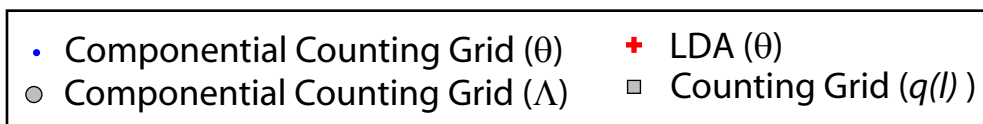

Supplement: Supplementary file [file 98f13708210194c475687be6106a3b84-Supplemental.zip]
