# Supplementary material
Source: ML conference proceedings conference paper supplement (https://proceedings.neurips.cc/paper_files/paper/2013/hash/98f13708210194c475687be6106a3b84-Abstract.html)
Supplement: Supplementary file [file 98f13708210194c475687be6106a3b84-Supplemental.zip]

|                            |                           |                                |                                 |                                 |                            |                                               |                                  |                                     |                                      |                                      |                             |                                 |                                |                         |                           |                            |                          |                              |                             |                             |                                    |                      |                            |                    |                           |                          |                       |              |                      |
|----------------------------|---------------------------|--------------------------------|---------------------------------|---------------------------------|----------------------------|-----------------------------------------------|----------------------------------|-------------------------------------|--------------------------------------|--------------------------------------|-----------------------------|---------------------------------|--------------------------------|-------------------------|---------------------------|----------------------------|--------------------------|------------------------------|-----------------------------|-----------------------------|------------------------------------|----------------------|----------------------------|--------------------|---------------------------|--------------------------|-----------------------|--------------|----------------------|
| onion                      | add golden                | fry heat                       | turmeric cumin fry              | coriander gravy seeded          | chilli splutter            | pressure cooker gram                          | wash aroma brinjal               | making airtight exclude             | dry ingredient                       | bag plastic seal first run           | place heavyduty             | cover combination               | large remain bowl              | small platter shake     | bacon small               | pour brains                | side scrape creme salmon | thick steak castiron         | thoroughly removable heat   | heat                        | medium                             | heat low             | medium                     | high burn prevent  | vegetable                 |                          | pam large             | onion        | saute                |
| onion tomatoe              | green add                 | cauliflower floret             | cumin turmeric ginger           | paneer ghee                     | curry powder bhindi cashew | coconut curry jaggergy crush done requirement | chappati malay veggie crush nice | store drink wet ton store           | skin gas workbowl metallic blade fit | plum refrigeration ready container   | pesto                       | combination bowl                | combination                    | transfer shake allspice | combination chestnut      | fragrant possible colorful | blacken blender          | steak quick move             | pepper scorch accumulate    | bell occasional medium      | frequently stir occasional         | meatball medium      | low mixture                | sizzle heat lump   | disappear beef cornbread  | beef wilt carrot         | cabbage carrot celery | celery       | green garlic onion   |
| garlic                     |                           | pea fry chick                  | second yoghurt                  | stirfry garnish                 | leave literal              | done requirement                              | nice                             | ton store                           | workbowl metallic blade fit          | container                            | glasses                     | chill                           | smoothe mound halfandhalf      | consistency calorie     | pine nut                  | puree                      | seeded                   | chile                        | constantly margarine        |                             | stir                               | low stir             | recover                    | broken flower      | seasonal gallon croutons  | pepper worcestershire    | medhigh               |              |                      |
| cayenne salt garlic        | clove evaporation mace    | cinnamon clove partially cover | pod peppercorn change           | cardamom low check              | has two one                | mince                                         | cleaver one extreme get          | knife steel                         | blade                                | food processor hold                  | glasses                     | chill                           | smoothe                        | anchore useful          | mill sit                  | puree                      | seeded                   | chile                        | constantly margarine        |                             | stir                               | low stir             | recover                    | broken flower      | seasonal gallon croutons  | pepper worcestershire    | medhigh               |              |                      |
| bay necessary              | evaporation add salt      | meantime absorbent             | raisin water                    | saffron rice clarify            | steam basmati              | lot possible any otherwise long               | chinese get                      | chinese market purchase available   | everything useful dont mean best     | coarse finger does plan substitution | double boiler gently        | ladyfinger avocado mixture      | whisk mixture                  | creame coffee           | thick magic               | corn cob cracker           | avocado                  | chile                        | constantly margarine        |                             | stir                               | low stir             | recover                    | broken flower      | seasonal gallon croutons  | pepper worcestershire    | medhigh               |              |                      |
| leaf ham meat              | additional tenderizer     | fork                           | pot biryani                     | rice                            | basmati                    | possible any otherwise long                   | japanese sure get brand          | available buy                       | useful dont mean best                | coarse finger does plan substitution | double boiler gently        | ladyfinger avocado mixture      | whisk mixture                  | creame coffee           | thick magic               | corn cob cracker           | avocado                  | chile                        | constantly margarine        |                             | stir                               | low stir             | recover                    | broken flower      | seasonal gallon croutons  | pepper worcestershire    | medhigh               |              |                      |
| meat                       | level continue tenderizer | water cover steadily           | lid                             |                                 | grain rice cook            | type cooker resultant                         | good want doesnt                 | method usual however                | because beings dont                  | lentil tarka difficult               | white brandy pour           | chocolate peak                  | gradual                        | fold slowly             | together additional three | shortening                 | steamer                  | chile                        | constantly margarine        |                             | stir                               | low stir             | recover                    | broken flower      | seasonal gallon croutons  | pepper worcestershire    | medhigh               |              |                      |
| during chorizo continue    | adding slowly             | cupful water enamel            | cupful dill                     | currant lowest tightfitting     | clear dish run             | start change sit                              | way indian try                   | indian know going                   | generation they kept                 | electric meringue                    | electric                    | rum stiff                       | beat                           | granulated cake         | bottom completion clean   | masa coming two            | strand ear sliver        | pot large snap               | asparagus refresh quart     | boil water                  | water boil                         | cold water boil      | hot five                   | keep               | strain med quenelle sieve | veal mussel              | wine                  | slowly       | raise garlic paprika |
| stove side wipe            | content point allowance   | leave burner base              | cutlet pour gently              | pick lift                       | back full                  | may reheat vary                               | useful given section             | needed completion                   | store tasty normal                   | container airtight                   | electric                    | rum stiff                       | beat                           | granulated cake         | bottom completion clean   | masa coming two            | strand ear sliver        | pot large snap               | asparagus refresh quart     | boil water                  | water boil                         | cold water boil      | hot five                   | keep               | strain med quenelle sieve | veal mussel              | wine                  | slowly       | raise garlic paprika |
| shank size fully           | teaspoonful               | teaspoonful                    | spoonful carefully pour         | bottom wooden procedure         | spatula quickly            | round nonstick spread                         | flat flow                        | least pancake texture               | biscotti griddle always              | crepe airtight long                  | almond peach                | rum stiff                       | beat                           | granulated cake         | bottom completion clean   | masa coming two            | strand ear sliver        | pot large snap               | asparagus refresh quart     | boil water                  | water boil                         | cold water boil      | hot five                   | keep               | strain med quenelle sieve | veal mussel              | wine                  | slowly       | raise garlic paprika |
| allowance cool             |                           |                                | panful                          | procedure                       | larger                     | side invert upside                            | slide                            | cylinder spatula second             | log                                  | cookie biscuit                       | sift grease                 | paper parchment golden          | pressing moisten               | ladyfinger egg          | spread evenly             | third breadcrumb           | third                    | instructions pesto           | angel linguine              | sink cook                   | colander drain                     | transparent          | stalk peach piece          | one eat piece      | tripe way simple          | excellence during family | formation bird        |              | check                |
| regularly polenta          | stream                    | place                          | bread crumb panful              | crumb bread                     | crumb crusty               | egg beaten                                    | lightly altogether               | one naan turn                       | apartment giddle                     | flatten handfl                       | diameter                    | together sheet                  | pressing moisten               | sheet border            | bottom seam               | set ricotta aside          | basil                    | spinache wilt                | tomatoe sundry              | oil mushy add               | chunk squid                        | chicken              | was greek summer           | correct year error | correct year error        | originate list recipe    | basic                 |              |                      |
| toaste mario               |                           |                                | crumb panful                    | toothpick mixture pour side     | brown dish                 | beaten                                        | altogether                       | sheet additional                    | beat                                 | sticky dough knead board             | divide shape circle         | surface towel damp round center | center form together form left | fill fold               | corner one                | lay stack fashion          | marjoram oregano         | zucchini scallion dill       | herb caper parsley          | pepper black                | outer dice                         | cut small            | okra easily cut            | dish small try     | preference                | manie came ask           | comment recipe        | include note |                      |
| anchovy soften             | olive wine                | fennel prosciutto              | side salt                       | place                           | preheat                    | ovenproof preheat                             | middle                           | sheet rack                          | beat                                 | flour bulk                           | flour bulk                  | divide shape circle             | center form together form left | fill fold               | corner one                | lay stack fashion          | marjoram oregano         | zucchini scallion dill       | herb caper parsley          | pepper black                | outer dice                         | cut small            | okra easily cut            | dish small try     | preference                | manie came ask           | comment recipe        | include note |                      |
| wine yield                 | rosemary                  | piece                          | place                           | removable chives                | minute                     | bake                                          |                                  | preheat baguette                    | work bowl rise                       | smoothe knead                        | elastic ball                | warm cloth                      | start together form left       | fill fold               | corner one                | lay stack fashion          | marjoram oregano         | zucchini scallion dill       | herb caper parsley          | pepper black                | outer dice                         | cut small            | okra easily cut            | dish small try     | preference                | manie came ask           | comment recipe        | include note |                      |
| calamari                   | seasonal saute            | fennel                         | removable place                 | removable place                 | degree                     | oven preheat                                  | bake                             | preheat baguette                    | work bowl rise                       | smoothe knead                        | elastic ball                | warm cloth                      | start together form left       | fill fold               | corner one                | lay stack fashion          | marjoram oregano         | zucchini scallion dill       | herb caper parsley          | pepper black                | outer dice                         | cut small            | okra easily cut            | dish small try     | preference                | manie came ask           | comment recipe        | include note |                      |
| extravirgin smoke          | seasonal divide oil       | degree                         | place                           | removable place                 | degree                     | oven preheat                                  | bake                             | preheat baguette                    | work bowl rise                       | smoothe knead                        | elastic ball                | warm cloth                      | start together form left       | fill fold               | corner one                | lay stack fashion          | marjoram oregano         | zucchini scallion dill       | herb caper parsley          | pepper black                | outer dice                         | cut small            | okra easily cut            | dish small try     | preference                | manie came ask           | comment recipe        | include note |                      |
| goldenbrown                | drizzle radicchio         | plate bath                     | set aside center                | center arrange preheat          | pecan                      | dish                                          |                                  | grease spray cornmeal               | pizza loaf                           | loaves double sprinkle               | warm ball palm              | useful equal bun                | start float bit                | fill fold               | corner one                | lay stack fashion          | marjoram oregano         | zucchini scallion dill       | herb caper parsley          | pepper black                | outer dice                         | cut small            | okra easily cut            | dish small try     | preference                | manie came ask           | comment recipe        | include note |                      |
| light dredge               | drizzle radicchio         | plate bath                     | set aside center                | center arrange preheat          | pecan                      | dish                                          |                                  | grease spray cornmeal               | pizza loaf                           | loaves double sprinkle               | warm ball palm              | useful equal bun                | start float bit                | fill fold               | corner one                | lay stack fashion          | marjoram oregano         | zucchini scallion dill       | herb caper parsley          | pepper black                | outer dice                         | cut small            | okra easily cut            | dish small try     | preference                | manie came ask           | comment recipe        | include note |                      |
| platter thin               | side flip                 | segment                        | pudding half                    | mix completion cool             | pour pattern               | cool insert tray                              |                                  | sharp resemblance                   | surface loose                        | long moist                           | machine bread feel          | starter size first              | desirable amount thoroughly    | amount feeding neat     | follow                    | fresh                      | refrigeration least      | croutons                     | bitesize bowl mix           | vinegar pour together       | mayonnaise lemon                   | lemon lengthways     | wedge lemon cut            | crabmeat           | fish heart                | cod fillet               | batch fritter         | paper        |                      |
| excessive flour            | side flip                 | segment                        | pudding half                    | mix completion cool             | pour pattern               | cool insert tray                              |                                  | sharp resemblance                   | surface loose                        | long moist                           | machine bread feel          | starter size first              | desirable amount thoroughly    | amount feeding neat     | follow                    | fresh                      | refrigeration least      | croutons                     | bitesize bowl mix           | vinegar pour together       | mayonnaise lemon                   | lemon lengthways     | wedge lemon cut            | crabmeat           | fish heart                | cod fillet               | batch fritter         | paper        |                      |
| fryer batter               | thin beer                 | ice three grapefruit centre    | orange touch essence            | four apricot tart               | tin cool soda              | squash honey cool                             |                                  | jam syrupy                          | has temperature five                 | soft pinch                           | stone wet rawa              | handful water effective         | little                         | another jambalaya       | useful first another      | overnight day month        | before hour overnight    | hour before thoroughly green | dressings vinaigrette salad | vinegar pour together       | mayonnaise lemon                   | lemon lengthways     | wedge lemon cut            | crabmeat           | fish heart                | cod fillet               | batch fritter         | paper        |                      |
| tempura absorbent spoonful | pancake boondi            | dessert enjoy                  | fruit halwa ensure              | decorative custard dessert milk | sugar                      | shown                                         |                                  | walnut sugar bark                   | sweet scald test                     | soft puffed                          | mostarda yoghurt cherry     | handful water effective         | little                         | another jambalaya       | useful first another      | overnight day month        | before hour overnight    | hour before thoroughly green | dressings vinaigrette salad | vinegar pour together       | mayonnaise lemon                   | lemon lengthways     | wedge lemon cut            | crabmeat           | fish heart                | cod fillet               | batch fritter         | paper        |                      |
| batter drop                | pancake boondi            | dessert enjoy                  | fruit halwa ensure              | decorative custard dessert milk | sugar                      | shown                                         |                                  | walnut sugar bark                   | sweet scald test                     | soft puffed                          | mostarda yoghurt cherry     | handful water effective         | little                         | another jambalaya       | useful first another      | overnight day month        | before hour overnight    | hour before thoroughly green | dressings vinaigrette salad | vinegar pour together       | mayonnaise lemon                   | lemon lengthways     | wedge lemon cut            | crabmeat           | fish heart                | cod fillet               | batch fritter         | paper        |                      |
| one once sufficient        | matzoh passover           | portion three once             | quantity tray equal             | mould mango                     | requirement essence        | pineapple dissolve                            |                                  | syrap                               | dissolve caramelization              | cornflour hard                       | cherry                      | machine bread feel              | little                         | another jambalaya       | useful first another      | overnight day month        | before hour overnight    | hour before thoroughly green | dressings vinaigrette salad | vinegar pour together       | mayonnaise lemon                   | lemon lengthways     | wedge lemon cut            | crabmeat           | fish heart                | cod fillet               | batch fritter         | paper        |                      |
| once one done              | matzoh passover           | portion three once             | quantity tray equal             | mould mango                     | requirement essence        | pineapple dissolve                            |                                  | syrap                               | dissolve caramelization              | cornflour hard                       | cherry                      | machine bread feel              | little                         | another jambalaya       | useful first another      | overnight day month        | before hour overnight    | hour before thoroughly green | dressings vinaigrette salad | vinegar pour together       | mayonnaise lemon                   | lemon lengthways     | wedge lemon cut            | crabmeat           | fish heart                | cod fillet               | batch fritter         | paper        |                      |
| marination                 | shallow                   | grill                          | curd curdle                     | two curd least                  | cloth paneer               | put pour leave                                |                                  | semolina                            | besan consistency                    | above dry                            | eggplant springing torai    | very pulp variation black       | turn oil another               | mediumlow               | optional wait taking      | oil break sautthe moisture | very dependent           | texture amount taste         | version guacamole mole      | personal cant useful choice | thai prik aromatic table tom curry | lime                 | thin beef couple pound     | sesame soy tofu    | prawn oil fry             | crisp hot                |                       |              |                      |
| piece panfry               | marinade                  | brush                          | cheese cloth                    | outside wood                    | thread possible useful     | leave length close                            |                                  | fine                                | accommodate                          | coarse chop                          | tool pit                    | bitter min                      | red lunch                      | mediumlow               | optional wait taking      | oil break sautthe moisture | very dependent           | texture amount taste         | version guacamole mole      | personal cant useful choice | thai prik aromatic table tom curry | lime                 | thin beef couple pound     | sesame soy tofu    | prawn oil fry             | crisp hot                |                       |              |                      |
| breast                     | marinade                  | brush                          | cheese cloth                    | outside wood                    | thread possible useful     | leave length close                            |                                  | fine                                | accommodate                          | coarse chop                          | tool pit                    | bitter min                      | red lunch                      | mediumlow               | optional wait taking      | oil break sautthe moisture | very dependent           | texture amount taste         | version guacamole mole      | personal cant useful choice | thai prik aromatic table tom curry | lime                 | thin beef couple pound     | sesame soy tofu    | prawn oil fry             | crisp hot                |                       |              |                      |
| wings skin                 | sauerkraut save           | coal baste hour                | cheese cloth tie                | turn secure preferable          | pattie smoker cube         | cube                                          |                                  | pack length                         | roughly freshly chop                 | cupful                               | grate bottom another spread | canning tlbsp                   | daal turn half                 | mediumlow               | optional wait taking      | oil break sautthe moisture | very dependent           | texture amount taste         | version guacamole mole      | personal cant useful choice | thai prik aromatic table tom curry | lime                 | thin beef couple pound     | sesame soy tofu    | prawn oil fry             | crisp hot                |                       |              |                      |
| bone piece                 | drip skim                 | overnight marinade             | cavity carcasses                | turn secure preferable          | pattie smoker cube         | cube                                          |                                  | pack length                         | roughly freshly chop                 | cupful                               | grate bottom another spread | canning tlbsp                   | daal turn half                 | mediumlow               | optional wait taking      | oil break sautthe moisture | very dependent           | texture amount taste         | version guacamole mole      | personal cant useful choice | thai prik aromatic table tom curry | lime                 | thin beef couple pound     | sesame soy tofu    | prawn oil fry             | crisp hot                |                       |              |                      |
| duck cut turnip            | render excessive large    | pork rib hare                  | meat hour                       | kabob turn stuff                | stuff mix                  | inch                                          |                                  | push crock                          | jack reify                           | uncooked                             | spread                      | casserole cottage sprinkle      | spaghetti                      | direction according     | macaroni                  | mushroom                   | sauce completion         | individual wish slightly     | italian has serve           | dish meal                   | briefly fondue meal                | broth ladleful       | reduce bringing boil       | remain add         | add                       | removable add fryer      |                       |              |                      |
| removable pot kidney       | removable fat             | sausage                        | case                            | together spice                  | thoroughly                 | ground                                        |                                  | ground                              | lamb                                 | chipped taco                         | bubble spread               | mozzarella                      | parmesan                       | package nutmeg          | salt parsley              | wine parsley truffle       | garvin french fernande   | comment french dish          | leftover provencal          | just limp                   | immediately                        | broth ladleful       | reduce bringing boil       | bringin boil       | uncover                   | simmer                   | return                |              |                      |
| brown                      | cook                      | potato                         | together pumpkin mixture yogurt | spice                           | dosa tava                  | grinder                                       |                                  | rest ground electric paste together | hamburger                            | microwaveable                        | layer                       | ricotta noodle lasagna          | sauteion sauce                 | pepper linguini         | ovenproof butter dot      | garvin french fernande     | comment french dish      | leftover provencal           | just limp                   | immediately                 | broth ladleful                     | reduce bringing boil | bringin boil               | uncover            | simmer                    | return                   |                       |              |                      |
| light onion                | set add                   | potato                         | jacket                          | mix above paste                 | apply                      | grind                                         |                                  | chutney urad dal                    | soak fine together                   | ingredient                           | twice fork pat wrap char    | dish mixture nonstick           | stand arrange                  | broil                   | combination               | coat                       | meanwhile                | scallop dot                  | art garvin fernande         | cast large                  | skillet                            | cook cajun           | moderator crisptender cook | longer large foam  | soften                    | cover simmer heat        | lower tenderizer      |              |                      |
| add onion                  | golden add                | salt                           | chile mustard                   | masala chile                    | powder chaat               | chutney urad dal                              |                                  | soak fine together                  | give                                 | ingredient                           | twice fork pat wrap char    | dish mixture nonstick           | stand arrange                  | broil                   | combination               | coat                       | meanwhile                | scallop dot                  | art garvin fernande         | cast large                  | skillet                            | cook cajun           | moderator crisptender cook | longer large foam  | soften                    | cover simmer heat        | lower tenderizer      |              |                      |
| tomatoe                    | oil                       | fry heat                       | mustard seeded pop              | seeded masala fenugreek         | powder seeded asafetida    | dal gram sambar                               |                                  | fine wash dry                       | making tiny oive                     | control                              | wrap char                   | dish mixture nonstick           | stand arrange                  | broil                   | combination               | coat                       | meanwhile                | scallop dot                  | art garvin fernande         | cast large                  | skillet                            | cook cajun           | moderator crisptender cook | longer large foam  | soften                    | cover simmer heat        | lower tenderizer      |              |                      |
